# Supplementary material for: Modulation of feeding behavior and metabolism by dynorphin
Source: PubMed Central journal article supplement (PMC7052232; doi:10.1038/s41598-020-60518-0), 2020-03-02

## **Modulation of feeding behavior and metabolism by dynorphin**

**Aishwarya Ghule<sup>1</sup>, Ildiko Rácz<sup>1,2</sup>, Andras Bilkei-Gorzo<sup>1</sup>, Este Leidmaa<sup>1</sup>, Meike Sieburg<sup>3</sup> and Andreas Zimmer<sup>1</sup>**

**<sup>1</sup> Institute of Molecular Psychiatry, University of Bonn, Medical Faculty, Venusberg Campus 1, 53127 Bonn, Germany**

**<sup>2</sup> Present address: Department of Neurodegenerative Diseases & Geriatric Psychiatry University of Bonn, Medical Faculty, Venusberg-Campus 1, 53127 Bonn, Germany**

**<sup>3</sup> Present address: Aarhus University, Department of Biomedicine/DANDRITE Capogna group, Ole Worms Alé 6, 8000, Aarhus C, Denmark**

Correspondence should be addressed to ABG (Email address: [abilkei@uni-bonn.de](mailto:abilkei@uni-bonn.de))

**Supplementary Table 1** Regression analysis of body weight changes

## Female ND

|                               | WT AL                     | WT TR               | KO AL               | KO TR               |
|-------------------------------|---------------------------|---------------------|---------------------|---------------------|
| Slope                         | 0.2495 ±<br>0.01723       | 0.3207 ±<br>0.03104 | 0.2691 ±<br>0.01376 | 0.3212 ±<br>0.02239 |
| Goodness of Fit (R square)    | 0.9633                    | 0.9302              | 0.9795              | 0.9626              |
| Is slope different from zero? | F 1,8 =<br>209.8          | F 1,8 =<br>106.7    | F 1,8 =<br>382.4    | F 1,8 =<br>205.7    |
| P value                       | <0.0001                   | <0.0001             | <0.0001             | <0.0001             |
| Are slopes equal?             | F 3,32 =2.725; p = 0.0604 |                     |                     |                     |

## Male ND

|                               | WT AL                    | WT TR               | KO AL             | KO TR               |
|-------------------------------|--------------------------|---------------------|-------------------|---------------------|
| Slope                         | 0.2409 to<br>0.4153      | 0.3123 to<br>0.3752 | 0.21 to<br>0.3849 | 0.5211 to<br>0.6034 |
| Goodness of Fit (R square)    | 0.904                    | 0.9876              | 0.8849            | 0.992               |
| Is slope different from zero? | F 1,8 =<br>75.29         | F 1,8 =<br>636.0    | F 1,8 =<br>61.48  | F 1,8 =<br>992.1    |
| P value                       | <0.0001                  | <0.0001             | <0.0001           | <0.0001             |
| Are slopes equal?             | F 3,32 =17.40; p < 0.001 |                     |                   |                     |

Female HFD

|                               | WT AL                    | WT TR               | KO AL              | KO TR              |
|-------------------------------|--------------------------|---------------------|--------------------|--------------------|
| Slope                         | 1.703 ±<br>0.03322       | 0.4158 ±<br>0.02269 | 1.975 ±<br>0.05399 | 1.065 ±<br>0.07628 |
| Goodness of Fit (R square)    | 0.997                    | 0.9767              | 0.9941             | 0.9606             |
| Is slope different from zero? | F 1,8 =<br>2629          | F 1,8 =<br>335.8    | F 1,8 =<br>1338    | F 1,8 =<br>195.1   |
| P value                       | <0.0001                  | <0.0001             | <0.0001            | <0.0001            |
| Are slopes equal?             | F 3,32 =187.4; p < 0.001 |                     |                    |                    |

Male HFD

|                               | WT AL                    | WT TR               | KO AL             | KO TR             |
|-------------------------------|--------------------------|---------------------|-------------------|-------------------|
| Slope                         | 1.07 to<br>1.182         | 0.6355 to<br>0.7805 | 1.991 to<br>2.271 | 1.052 to<br>1.235 |
| Goodness of Fit (R square)    | 0.9963                   | 0.9845              | 0.9935            | 0.9905            |
| Is slope different from zero? | F 1,8 =<br>2132          | F 1,8 =<br>507.2    | F 1,8 =<br>1232   | F 1,8 =<br>992.1  |
| P value                       | <0.0001                  | <0.0001             | <0.0001           | <0.0001           |
| Are slopes equal?             | F 3,32 =213.4; p < 0.001 |                     |                   |                   |

**Supplementary Table 2** Three-way ANOVA analysis of body weight values

Female ND

| Source of variation              | Df  | Sum of squares | Mean square | F        | P value  |
|----------------------------------|-----|----------------|-------------|----------|----------|
| Genotype                         | 1   | 3.7135         | 3.7135      | 0.16969  | 0.683313 |
| Administration                   | 1   | 154.3538       | 154.3538    | 7.05334  | 0.017757 |
| Genotype x administration        | 1   | 28.1493        | 28.1493     | 1.28631  | 0.265711 |
| Error                            | 30  | 656.5137       | 21.8838     |          |          |
| Time                             | 10  | 312.0365       | 49.2937     | 72.49239 | 0.000000 |
| Genotype x time                  | 10  | 2.0577         | 0.2058      | 0.47804  | 0.903777 |
| Administration x time            | 10  | 7.3549         | 0.7355      | 1.70868  | 0.078032 |
| Genotype x administration x time | 10  | 2.6234         | 0.2623      | 0.60948  | 0.805616 |
| Error                            | 300 | 129.1321       | 0.4304      |          |          |

## Male ND

| Source of variation              | Df  | Sum of squares | Mean square | F        | P value  |
|----------------------------------|-----|----------------|-------------|----------|----------|
| Genotype                         | 1   | 33.6678        | 33.6678     | 1.91350  | 0.177506 |
| Administration                   | 1   | 120.1119       | 120.1119    | 6.82653  | 0.014283 |
| Genotype x administration        | 1   | 111.6486       | 111.6486    | 6.34552  | 0.017757 |
| Error                            | 28  | 492.6566       | 17.5949     |          |          |
| Time                             | 10  | 492.9366       | 49.2937     | 46.78112 | 0.000000 |
| Genotype x time                  | 10  | 12.4798        | 1.2480      | 1.18437  | 0.301116 |
| Administration x time            | 10  | 19.8644        | 1.9864      | 1.88519  | 0.047054 |
| Genotype x administration x time | 10  | 23.5026        | 2.3503      | 2.23046  | 0.016351 |
| Error                            | 280 | 295.0384       | 1.0537      |          |          |

Female HFD

| Source of variation              | Df  | Sum of squares | Mean square | F        | P value  |
|----------------------------------|-----|----------------|-------------|----------|----------|
| Genotype                         | 1   | 177.78         | 177.78      | 3.7778   | 0.061370 |
| Administration                   | 1   | 6387.30        | 6387.30     | 135.7250 | 0.000000 |
| Genotype x administration        | 1   | 13.47          | 13.47       | 0.2862   | 0.596585 |
| Error                            | 30  | 1411.82        | 47.06       |          |          |
| Time                             | 10  | 5778.65        | 577.86      | 343.3111 | 0.000000 |
| Genotype x time                  | 10  | 191.79         | 19.18       | 11.3944  | 0.000000 |
| Administration x time            | 10  | 1177.49        | 117.75      | 69.9550  | 0.000000 |
| Genotype x administration x time | 10  | 33.64          | 3.36        | 0.60948  | 0.033247 |
| Error                            | 300 | 504.96         | 1.68        |          |          |

Male HFD

| Source of variation              | Df  | Sum of squares | Mean square | F        | P value  |
|----------------------------------|-----|----------------|-------------|----------|----------|
| Genotype                         | 1   | 1200.69        | 1200.69     | 14.1087  | 0.000880 |
| Administration                   | 1   | 2956.28        | 2956.28     | 34.7378  | 0.000003 |
| Genotype x administration        | 1   | 346.70         | 346.70      | 4.0739   | 0.053978 |
| Error                            | 26  | 2212.67        | 85.10       |          |          |
| Time                             | 10  | 5241.09        | 524.11      | 297.5148 | 0.000000 |
| Genotype x time                  | 10  | 413.51         | 41.35       | 23.4730  | 0.000000 |
| Administration x time            | 10  | 474.10         | 47.41       | 26.9125  | 0.000000 |
| Genotype x administration x time | 10  | 79.81          | 7.98        | 4.5302   | 0.000006 |
| Error                            | 260 | 458.02         | 1.76        |          |          |

**Supplementary Table 3** Three-way ANOVA analysis of food consumed

Female ND

| <b>Source of variation</b>       | <b>Df</b> | <b>Sum of squares</b> | <b>Mean square</b> | <b>F</b> | <b>P value</b> |
|----------------------------------|-----------|-----------------------|--------------------|----------|----------------|
| Genotype                         | 1         | 3459                  | 3459               | 0.815    | 0.417791       |
| Administration                   | 1         | 809039                | 809039             | 190.5    | 0.000160       |
| Genotype x administration        | 1         | 69839                 | 69839              | 16.45    | 0.015403       |
| Error                            | 4         | 16983                 | 4246               |          |                |
| Time                             | 11        | 82149                 | 7468               | 0.899    | 0.548835       |
| Genotype x time                  | 11        | 46215                 | 4201               | 0.506    | 0.889109       |
| Administration x time            | 11        | 52705                 | 4791               | 0.577    | 0.837120       |
| Genotype x administration x time | 11        | 36113                 | 3283               | 0.395    | 0.950740       |
| Error                            | 44        | 365556                | 8308               |          |                |



## Male ND

| Source of variation              | Df | Sum of squares | Mean square | F     | P value  |
|----------------------------------|----|----------------|-------------|-------|----------|
| Genotype                         | 1  | 94429          | 94429       | 1.213 | 0.332469 |
| Administration                   | 1  | 120785         | 120785      | 1.552 | 0.280800 |
| Genotype x administration        | 1  | 77330          | 77330       | 0.994 | 0.375246 |
| Error                            | 4  | 311262         | 77816       |       |          |
| Time                             | 11 | 133157         | 12105       | 3.785 | 0.000745 |
| Genotype x time                  | 11 | 13347          | 1213        | 0.379 | 0.957361 |
| Administration x time            | 11 | 23333          | 2121        | 0.663 | 0.764431 |
| Genotype x administration x time | 11 | 42219          | 3838        | 1.200 | 0.315233 |
| Error                            | 44 | 140724         | 3198        |       |          |

Female HFD

| Source of variation              | Df | Sum of squares | Mean square | F      | P value  |
|----------------------------------|----|----------------|-------------|--------|----------|
| Genotype                         | 1  | 1445           | 1445        | 0.154  | 0.714465 |
| Administration                   | 1  | 940220         | 940220      | 100.4  | 0.000557 |
| Genotype x administration        | 1  | 9799           | 9799        | 1.047  | 0.364118 |
| Error                            | 4  | 37449          | 9362        |        |          |
| Time                             | 11 | 396322         | 36029       | 10.443 | 0.000000 |
| Genotype x time                  | 11 | 15720          | 1429        | 0.414  | 0.941983 |
| Administration x time            | 11 | 65787          | 5981        | 1.734  | 0.097214 |
| Genotype x administration x time | 11 | 32072          | 2916        | 0.845  | 0.597621 |
| Error                            | 44 | 151801         | 3450        |        |          |

## Male HFD

| Source of variation              | Df | Sum of squares | Mean square | F      | P value  |
|----------------------------------|----|----------------|-------------|--------|----------|
| Genotype                         | 1  | 4644           | 4644        | 0.591  | 0.484959 |
| Administration                   | 1  | 309886         | 309886      | 39.431 | 0.003284 |
| Genotype x administration        | 1  | 588            | 588         | 0.075  | 0.798067 |
| Error                            | 4  | 31436          | 7859        |        |          |
| Time                             | 11 | 210759         | 19160       | 6.721  | 0.000002 |
| Genotype x time                  | 11 | 14601          | 1327        | 0.466  | 0.914436 |
| Administration x time            | 11 | 19003          | 1728        | 0.606  | 0.813508 |
| Genotype x administration x time | 11 | 6952           | 632         | 0.222  | 0.994947 |
| Error                            | 44 | 125440         | 2851        |        |          |

**Supplementary Table 4:** Blood glucose levels in WT and KO animals

| Male ND | TR WT         | TR KO         | AL WT         | AL KO          |
|---------|---------------|---------------|---------------|----------------|
|         | mean mg/dL    | mean mg/dL    | mean mg/dL    | mean mg/dL     |
| week 3  | 120.37 ± 9.7  | 125.25 ± 9.79 | 132.11 ± 9.23 | 163.14 ± 10.46 |
| week 5  | 123.5 ± 7.66  | 148 ± 7.67    | 114.33 ± 7.23 | 110.14 ± 8.2   |
| week 7  | 130.12 ± 8.9  | 128.5 ± 8.9   | 146.11 ± 8.39 | 151.14 ± 9.51  |
| week 9  | 147.75 ± 8.45 | 129 ± 8.46    | 113.66 ± 7.97 | 153 ± 9.04     |
| week 11 | 160.37 ± 8.66 | 147.75 ± 8.66 | 137 ± 8.17    | 166.28 ± 9.26  |

| Female ND | TR WT         | TR KO         | AL WT         | AL KO           |
|-----------|---------------|---------------|---------------|-----------------|
|           | mean mg/dL    | mean mg/dL    | mean mg/dL    | mean mg/dL      |
| week 3    | 125.12 ± 9.79 | 128 ± 9.23    | 107 ± 9.23    | 136.87 ± 9.79 * |
| week 5    | 102.62 ± 7.67 | 111.44 ± 7.23 | 91.55 ± 7.23  | 111.87 ± 7.67   |
| week 7    | 106.62 ± 8.9  | 97.22 ± 8.39  | 118.55 ± 8.39 | 133.75 ± 8.9    |
| week 9    | 124 ± 8.46    | 133.77 ± 7.97 | 130.66 ± 7.97 | 124.12 ± 8.46   |
| week 11   | 143.25 ± 8.66 | 132.55 ± 8.17 | 112.88 ± 8.17 | 139 ± 8.66      |

| Male HFD | TR WT          | TR KO         | AL WT         | AL KO          |
|----------|----------------|---------------|---------------|----------------|
|          | mean mg/dL     | mean mg/dL    | mean mg/dL    | mean mg/dL     |
| week 3   | 138.42 ± 10.46 | 145.25 ± 9.79 | 158.5 ± 9.79  | 198.42 ± 10.46 |
| week 5   | 121.42 ± 8.2   | 133.5 ± 7.67  | 163.12 ± 7.67 | 160.57 ± 8.2   |
| week 7   | 150.85 ± 9.51  | 167.25 ± 8.9  | 193.12 ± 8.9  | 204.28 ± 9.51  |
| week 9   | 135.85 ± 9.04  | 168.87 ± 8.46 | 171.37 ± 8.46 | 188.42 ± 9.04  |
| week 11  | 171.14 ± 9.26  | 193.5 ± 8.66  | 189.37 ± 8.66 | 207.14 ± 9.26  |

| Female HFD | TR WT        | TR KO           | AL WT         | AL KO         |
|------------|--------------|-----------------|---------------|---------------|
|            | mean mg/dL   | mean mg/dL      | mean mg/dL    | mean mg/dL    |
| week 3     | 117.1 ± 8.76 | 118.37 ± 9.79   | 163.5 ± 9.79  | 171.87 ± 9.79 |
| week 5     | 106.1 ± 6.86 | 125.25 ± 7.67   | 142.5 ± 7.67  | 134.5 ± 7.67  |
| week 7     | 116.5 ± 7.96 | 124.62 ± 8.9    | 175.12 ± 8.9  | 166.87 ± 8.9  |
| week 9     | 139.3 ± 7.56 | 157.75 ± 8.46   | 156.87 ± 8.46 | 183.25 ± 8.46 |
| week 11    | 132.2 ± 7.75 | 168.12 ± 8.66 * | 168.12 ± 8.66 | 183.37 ± 8.66 |

**Supplementary Figure S1.** Body weight values at the beginning of the experiments. \*\*\*  $p < 0.001$  difference between males and females according to Šidák's test. #  $p < 0.05$  difference between WT and KO according to Šidák's test. Bars represent mean values, whiskers SEM.

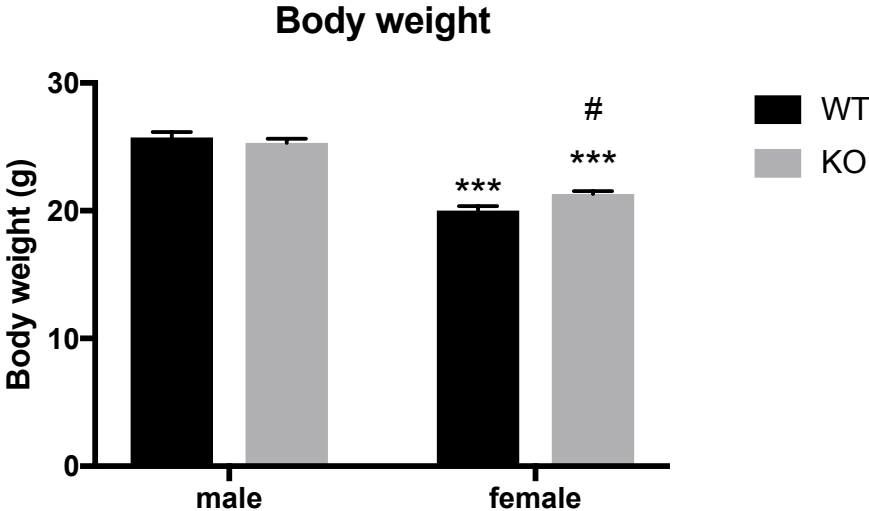

**Supplementary Figure S2.** High magnification images of immunohistochemical staining of NPY in the arcuate nucleus. Female animals on a normal diet are shown in (A), males in (B). Female animals on a high fat diet are shown in (C), males in (D). The scale bar represents 50  $\mu\text{m}$

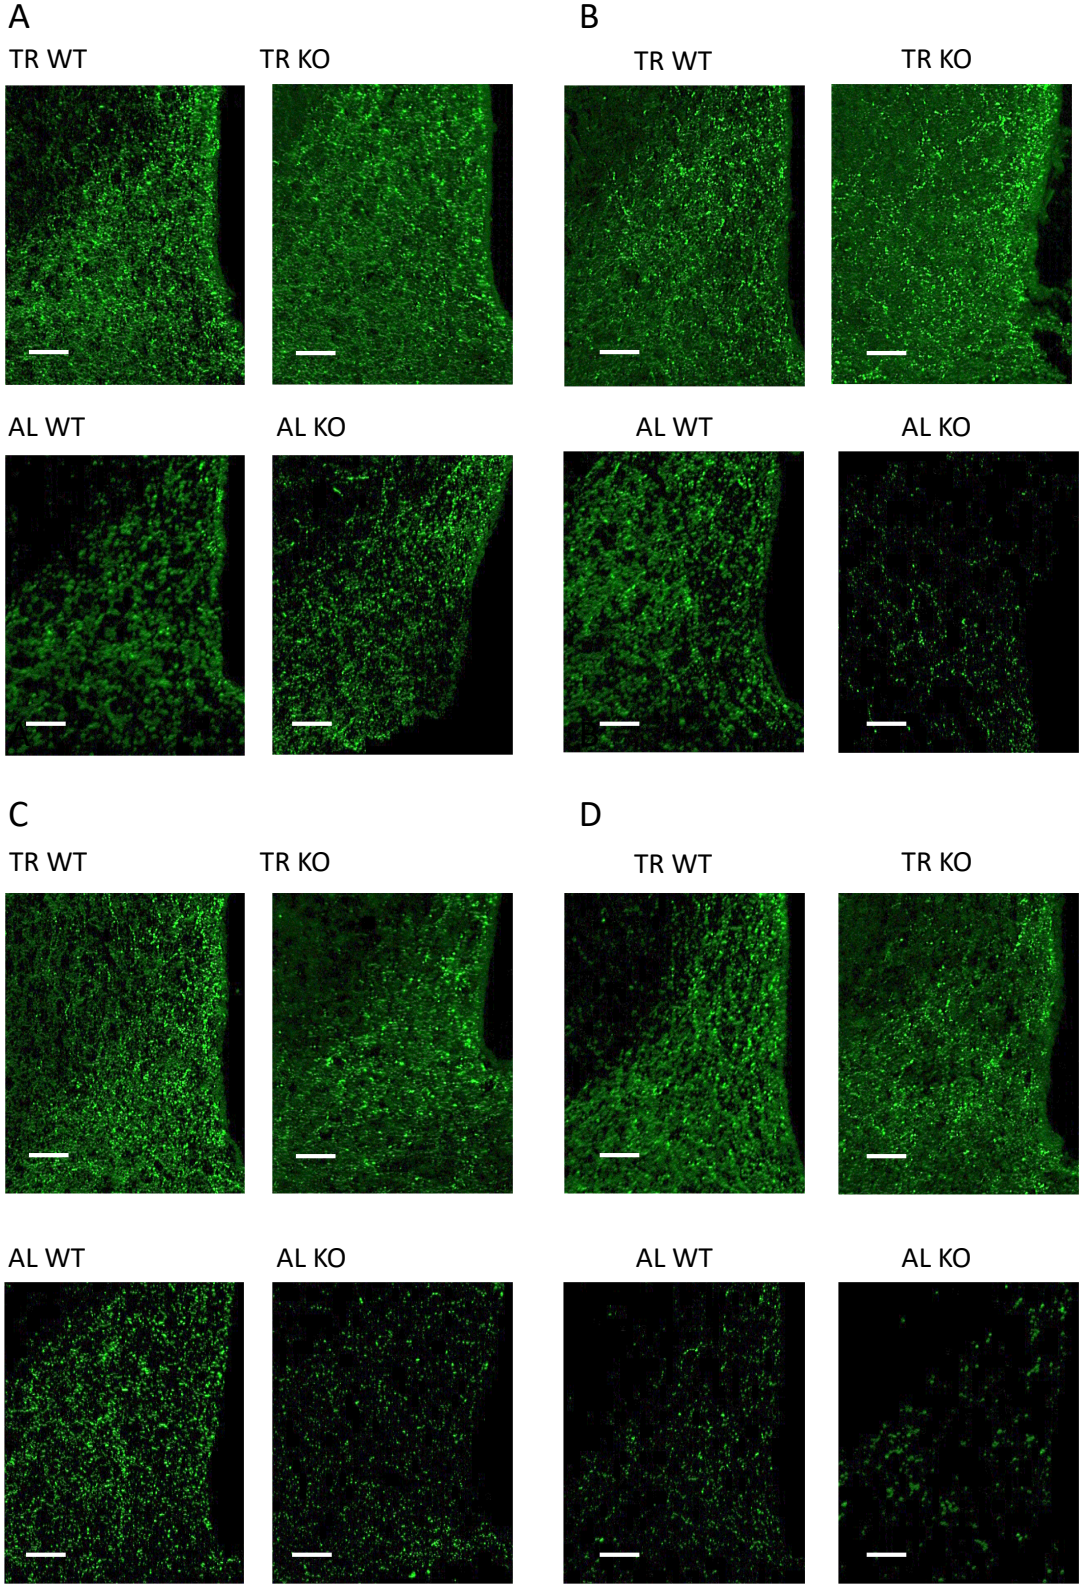

**Supplementary Figure S3.** High magnification images of immunohistochemical staining of orexin-A in the lateral hypothalamus. Female animals on a normal diet are shown in (A), males in (B). Female animals on a high fat diet are shown in (C), males in (D). The scale bar represents 50  $\mu$ m

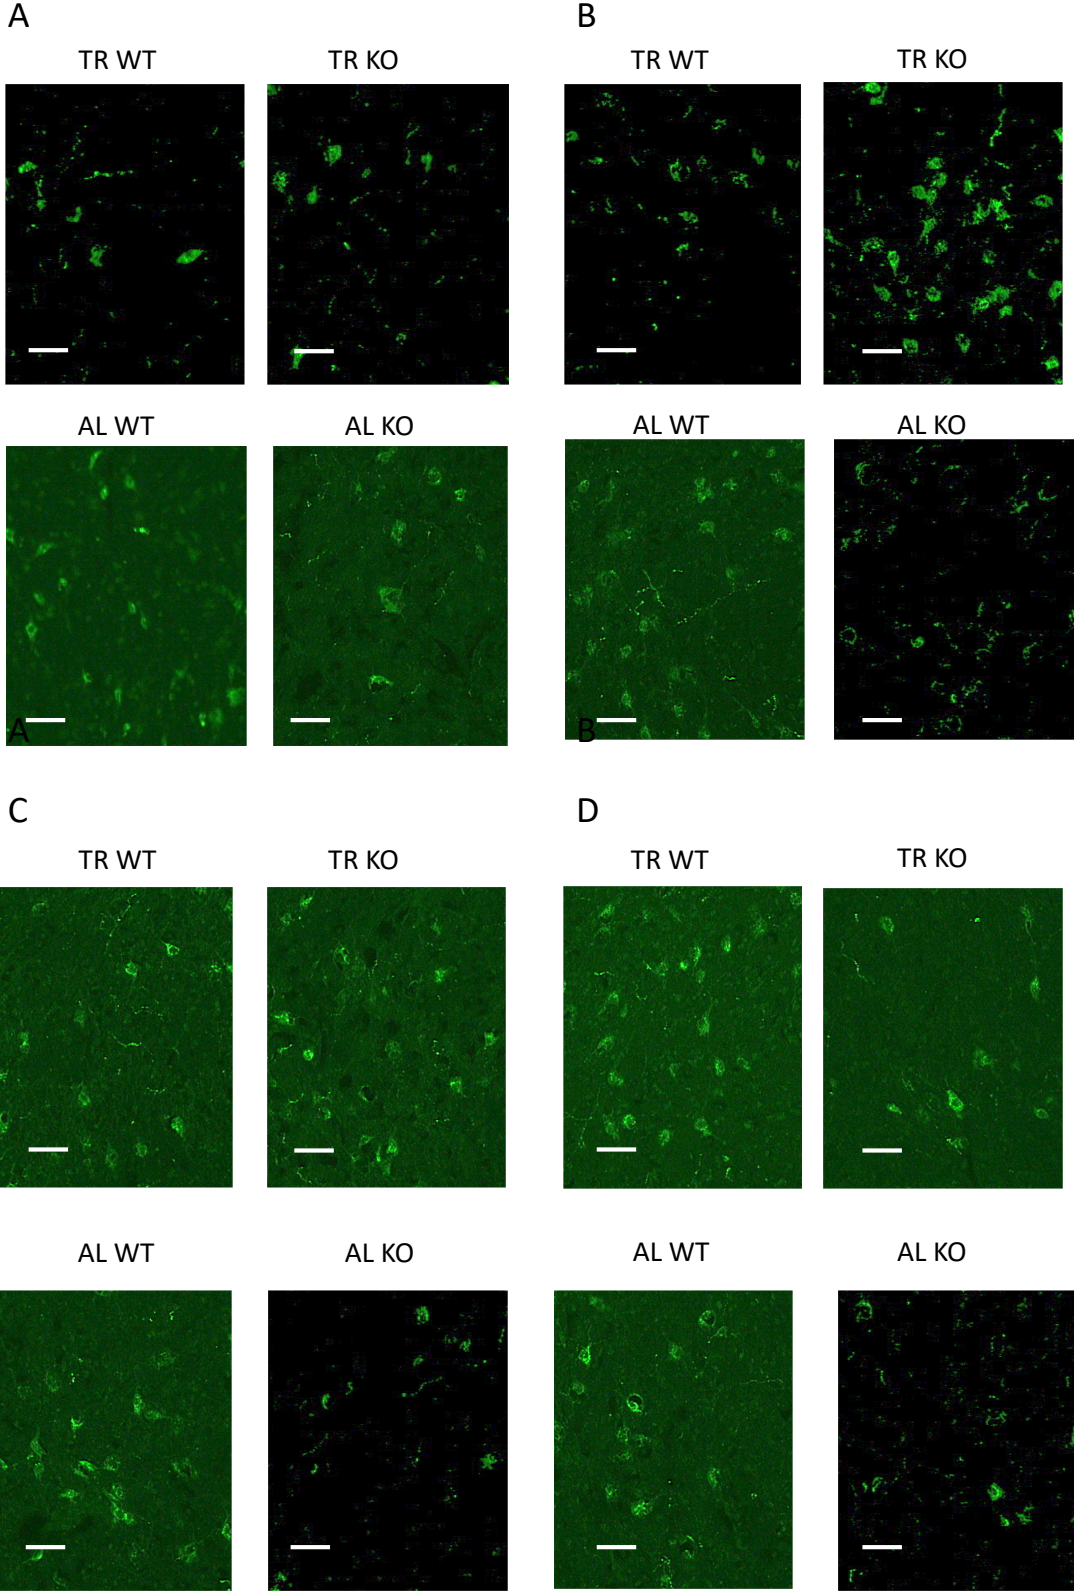

Supplement: 41598_2020_60518_MOESM1_ESM.pdf [file 41598_2020_60518_MOESM1_ESM.pdf]
